# Supplementary material for: Immune modulating effects of cyclophosphamide and treatment with tumor lysate/CpG synergize to eliminate murine neuroblastoma
Source: PubMed Central journal article supplement (PMC4469315; doi:10.1186/s40425-015-0071-3), 2015-06-16
Supplement: 40425_2015_71_MOESM1_ESM.pdf [file 40425_2015_71_MOESM1_ESM.pdf]

Day: 20                      27                      35                      48                      57

Untreated

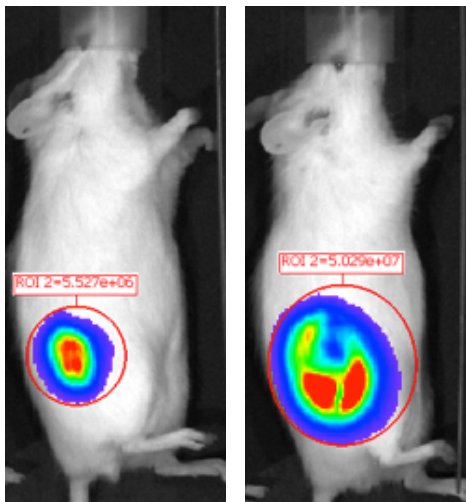

Cy only

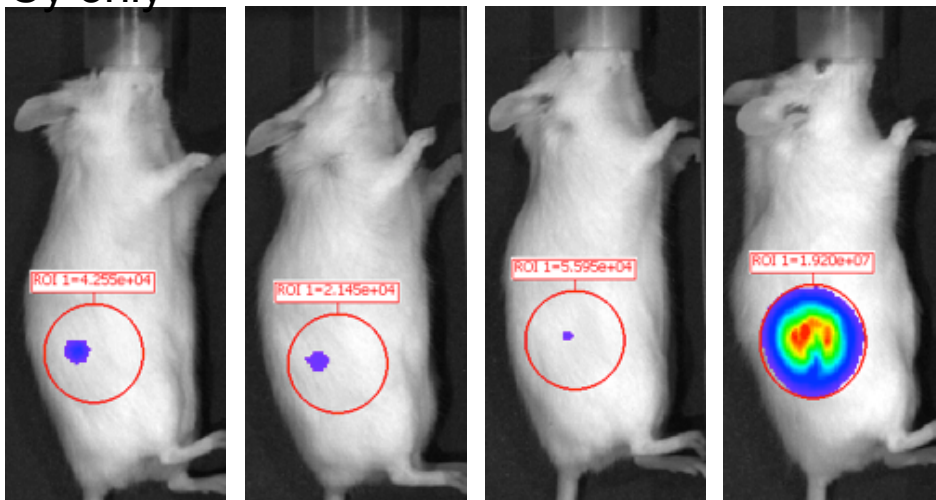

Cy lysate/CpG

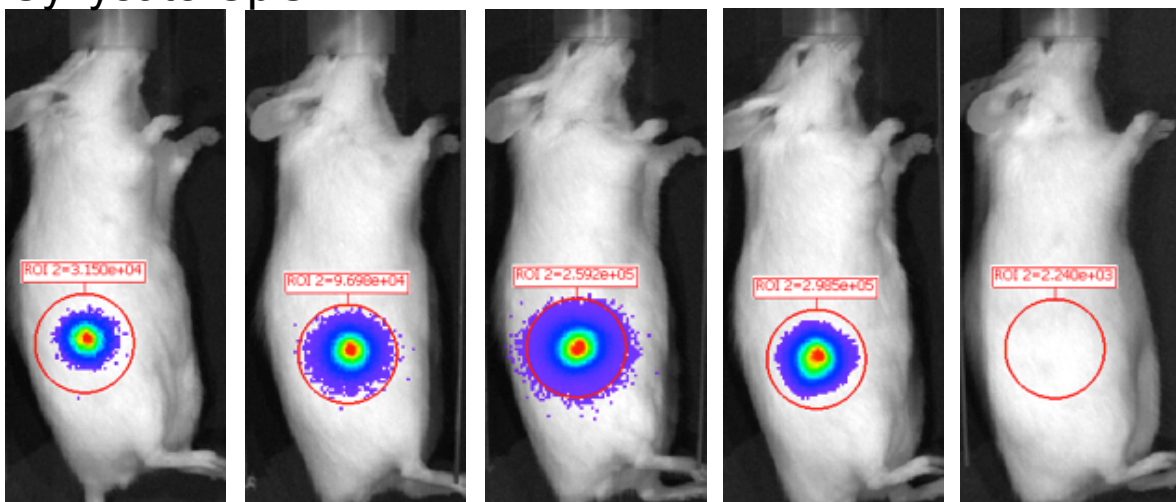

Supplemental Figure 1
